# Supplementary material
Source: PubMed Central journal article supplement (PMC3043661)
Supplement: supp_ddq553_ddq553supp.pdf [file supp_ddq553_ddq553supp.pdf]

**Figure S1:** The cumulative distribution of 5' splice site score differences caused by 5' splice site SNPs in the seven HapMap lymphoblastoid cell lines.

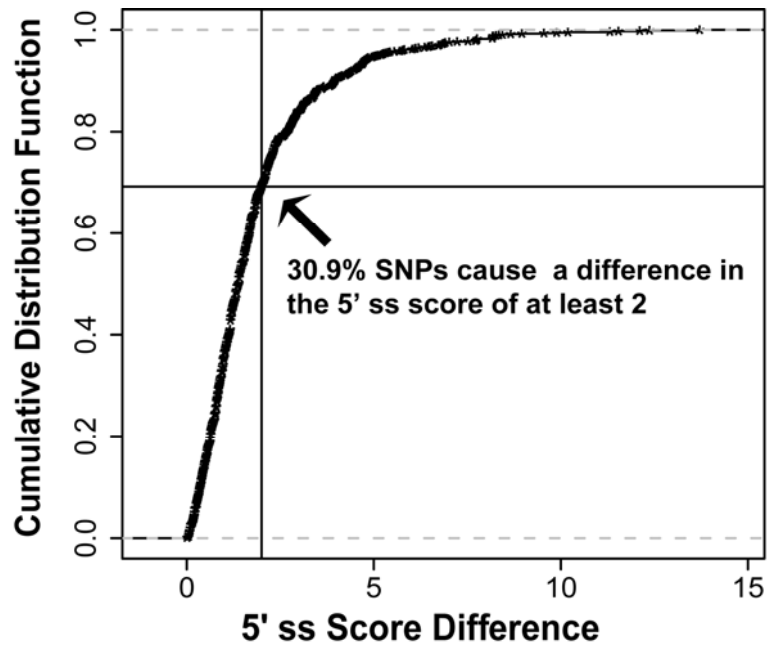

**Figure S2:** Minigene experiments confirm the causal impact of 5' splice site SNPs on splicing of five exons.

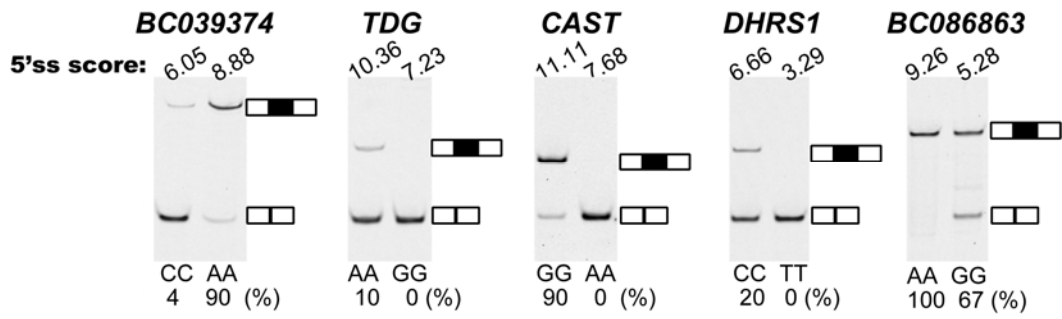

**Figure S3:** Results of *TRIM62* minigene experiments by site-directed G-to-A disruptions of poly-G runs. (A) Schematic diagrams of mutant minigene constructs with serial disruptions of poly-G runs. (B) Disruptions of poly-G runs in the minigene constructs containing the wildtype 3' splice site have no impact on exon splicing (left panel). Disruptions of poly-G runs in the minigene constructs containing the mutant (weakened) 3' splice site significantly reduce the exon inclusion level of the *TRIM62* exon.

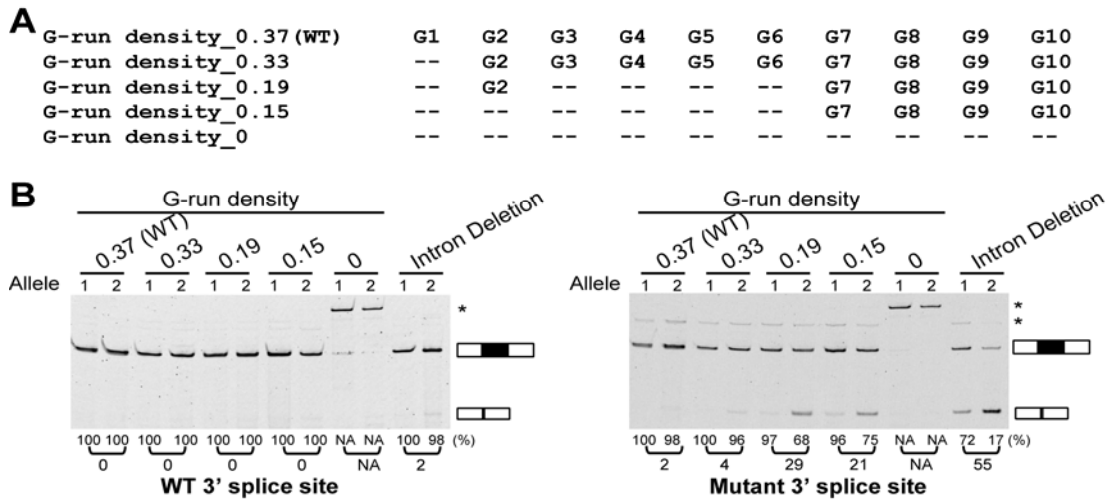

**Figure S4:** The effects of siRNA knockdown of *hnRNP H* (*HNRNPH1*) on the splicing of the *TRIM62* minigene constructs. (A) The mRNA concentrations of *hnRNP H* after treatments by siRNA for *hnRNP H* or by control siRNA. Error bars represent the standard error of the mean of the mRNA concentration estimated by four replicate treatments. (B) Western blot analysis of HNRNPH1 protein level after treatments by siRNA for *hnRNP H* or by control siRNA. (C) The siRNA knockdown of *hnRNP H* affects the splicing of the *TRIM62* minigene construct with the mutant (weakened) 3' splice site, but not the splicing of the minigene construct with the wildtype 3' splice site.

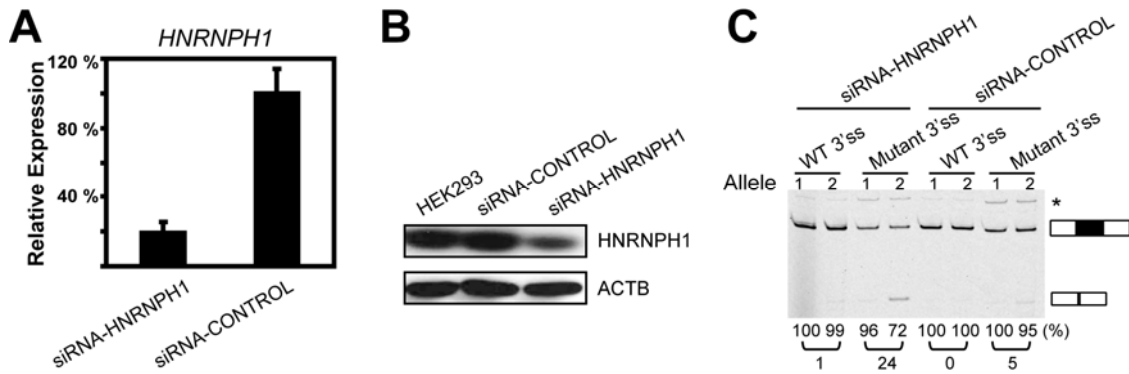

**Table S1:** Information of seven HapMap lymphoblastoid cell lines.

| <b>Individual ID</b> | <b>Catalog ID<sup>a</sup></b> | <b>Ancestry</b>                                                          | <b>Source of SNP data</b> |
|----------------------|-------------------------------|--------------------------------------------------------------------------|---------------------------|
| NA18555              | GM18555                       | CHB (Han Chinese in Beijing, China)                                      | HapMap, Exome sequencing  |
| NA18956              | GM18956                       | JPT (Japanese in Tokyo, Japan)                                           | HapMap, Exome sequencing  |
| NA19129              | GM19129 <sup>b</sup>          | YRI (Yoruba in Ibadan, Nigeria)                                          | HapMap, Exome sequencing  |
| NA19240              | GM19240 <sup>b</sup>          | YRI                                                                      | HapMap, Exome sequencing  |
| NA18517              | GM18517 <sup>b</sup>          | YRI                                                                      | HapMap, Exome sequencing  |
| NA12156              | GM12156 <sup>b</sup>          | CEU (U.S. Utah residents with ancestry from northern and western Europe) | HapMap, Exome sequencing  |
| NA12878              | GM12878 <sup>b</sup>          | CEU                                                                      | HapMap, Exome sequencing  |

a. Samples' catalog IDs at the Coriell Institute.

b. Affymetrix Exon 1.0 array data are available for these samples (see Materials and Methods).

**Table S2:** Fluorescently labeled RT-PCR results of 84 exons in seven HapMap lymphoblastoid cell lines. The expected positions of the exon inclusion and skipping PCR products are indicated to the right of the gel. Exons whose 5' splice site SNPs cause splicing differences among seven individuals are highlighted in red.

|                                            |                            |  |
|--------------------------------------------|----------------------------|--|
| <b>Gene Symbol</b>                         | <i>PKN2</i>                |  |
| <b>Exon Coordinates (hg18)</b>             | +chr1:89045800-89045875    |  |
| <b>SNP ID</b>                              | rs6671949                  |  |
| <b>Predicted Size (Skipping/Inclusion)</b> | 140/216                    |  |
| <b>Gene Symbol</b>                         | <i>TBC1D4</i>              |  |
| <b>Exon Coordinates (hg18)</b>             | -chr13:74813262-74813372   |  |
| <b>SNP ID</b>                              | rs9565152                  |  |
| <b>Predicted Size (Skipping/Inclusion)</b> | 125/236                    |  |
| <b>Gene Symbol</b>                         | <i>AX747187</i>            |  |
| <b>Exon Coordinates (hg18)</b>             | +chr12:95498506-95498598   |  |
| <b>SNP ID</b>                              | rs17025569                 |  |
| <b>Predicted Size (Skipping/Inclusion)</b> | 276/369                    |  |
| <b>Gene Symbol</b>                         | <i>C3orf31</i>             |  |
| <b>Exon Coordinates (hg18)</b>             | -chr3:11861365-11861570    |  |
| <b>SNP ID</b>                              | rs392621                   |  |
| <b>Predicted Size (Skipping/Inclusion)</b> | 112/318                    |  |
| <b>Gene Symbol</b>                         | <i>IMMT</i>                |  |
| <b>Exon Coordinates (hg18)</b>             | -chr2:86260067-86260256    |  |
| <b>SNP ID</b>                              | rs17027011                 |  |
| <b>Predicted Size (Skipping/Inclusion)</b> | 139/329                    |  |
| <b>Gene Symbol</b>                         | <i>MMAB</i>                |  |
| <b>Exon Coordinates (hg18)</b>             | -chr12:108483431-108483517 |  |
| <b>SNP ID</b>                              | rs12309115                 |  |
| <b>Predicted Size (Skipping/Inclusion)</b> | 71/158                     |  |

|                                            |                          |  |
|--------------------------------------------|--------------------------|--|
| <b>Gene Symbol</b>                         | <i>UNC13D</i>            |  |
| <b>Exon Coordinates (hg18)</b>             | -chr17:71342596-71342739 |  |
| <b>SNP ID</b>                              | rs17581728               |  |
| <b>Predicted Size (Skipping/Inclusion)</b> | 88/232                   |  |

|                                            |                          |  |
|--------------------------------------------|--------------------------|--|
| <b>Gene Symbol</b>                         | <i>FTSJ3</i>             |  |
| <b>Exon Coordinates (hg18)</b>             | -chr17:59255176-59255331 |  |
| <b>SNP ID</b>                              | rs2584627                |  |
| <b>Predicted Size (Skipping/Inclusion)</b> | 82/238                   |  |

|                                            |                           |  |
|--------------------------------------------|---------------------------|--|
| <b>Gene Symbol</b>                         | <i>SLC22A4</i>            |  |
| <b>Exon Coordinates (hg18)</b>             | +chr5:131695348-131695442 |  |
| <b>SNP ID</b>                              | rs2304081                 |  |
| <b>Predicted Size (Skipping/Inclusion)</b> | 160/255                   |  |

|                                            |                           |  |
|--------------------------------------------|---------------------------|--|
| <b>Gene Symbol</b>                         | <i>TBLIXR1</i>            |  |
| <b>Exon Coordinates (hg18)</b>             | -chr3:178247968-178248031 |  |
| <b>SNP ID</b>                              | rs3749234                 |  |
| <b>Predicted Size (Skipping/Inclusion)</b> | 83/147                    |  |

|                                            |                           |  |
|--------------------------------------------|---------------------------|--|
| <b>Gene Symbol</b>                         | <i>PTPN14</i>             |  |
| <b>Exon Coordinates (hg18)</b>             | -chr1:212637879-212637967 |  |
| <b>SNP ID</b>                              | rs11580603                |  |
| <b>Predicted Size (Skipping/Inclusion)</b> | 111/200                   |  |

|                                            |                          |  |
|--------------------------------------------|--------------------------|--|
| <b>Gene Symbol</b>                         | <i>KIF18B</i>            |  |
| <b>Exon Coordinates (hg18)</b>             | -chr17:40364496-40364623 |  |
| <b>SNP ID</b>                              | rs17546822               |  |
| <b>Predicted Size (Skipping/Inclusion)</b> | 101/229                  |  |

|                                            |                        |  |
|--------------------------------------------|------------------------|--|
| <b>Gene Symbol</b>                         | <i>PFAS</i>            |  |
| <b>Exon Coordinates (hg18)</b>             | +chr17:8099848-8099953 |  |
| <b>SNP ID</b>                              | rs7221716              |  |
| <b>Predicted Size (Skipping/Inclusion)</b> | 230/336                |  |

|                                            |                         |  |
|--------------------------------------------|-------------------------|--|
| <b>Gene Symbol</b>                         | <i>ZNRD1</i>            |  |
| <b>Exon Coordinates (hg18)</b>             | +chr6:30137980-30138089 |  |
| <b>SNP ID</b>                              | rs9261269               |  |
| <b>Predicted Size (Skipping/Inclusion)</b> | 212/322                 |  |

|                                            |                            |  |
|--------------------------------------------|----------------------------|--|
| <b>Gene Symbol</b>                         | <i>MPHOSPH9</i>            |  |
| <b>Exon Coordinates (hg18)</b>             | -chr12:122211281-122211349 |  |
| <b>SNP ID</b>                              | rs1260317                  |  |
| <b>Predicted Size (Skipping/Inclusion)</b> | 133/202                    |  |

|                                            |                         |  |
|--------------------------------------------|-------------------------|--|
| <b>Gene Symbol</b>                         | <i>DST</i>              |  |
| <b>Exon Coordinates (hg18)</b>             | -chr6:56534895-56534957 |  |
| <b>SNP ID</b>                              | rs9367689               |  |
| <b>Predicted Size (Skipping/Inclusion)</b> | 252/315                 |  |

|                                            |                         |  |
|--------------------------------------------|-------------------------|--|
| <b>Gene Symbol</b>                         | <i>MTF1</i>             |  |
| <b>Exon Coordinates (hg18)</b>             | -chr1:38061969-38062071 |  |
| <b>SNP ID</b>                              | rs12751325              |  |
| <b>Predicted Size (Skipping/Inclusion)</b> | 295/398                 |  |

|                                            |                         |  |
|--------------------------------------------|-------------------------|--|
| <b>Gene Symbol</b>                         | <i>TRIM62</i>           |  |
| <b>Exon Coordinates (hg18)</b>             | -chr1:33403659-33403754 |  |
| <b>SNP ID</b>                              | rs2306257               |  |
| <b>Predicted Size (Skipping/Inclusion)</b> | 217/313                 |  |

|                                            |                           |  |
|--------------------------------------------|---------------------------|--|
| <b>Gene Symbol</b>                         | <i>BC086863</i>           |  |
| <b>Exon Coordinates (hg18)</b>             | -chr1:217389904-217389996 |  |
| <b>SNP ID</b>                              | rs12079503                |  |
| <b>Predicted Size (Skipping/Inclusion)</b> | 109/202                   |  |

|                                            |                         |  |
|--------------------------------------------|-------------------------|--|
| <b>Gene Symbol</b>                         | <i>DNASE1L3</i>         |  |
| <b>Exon Coordinates (hg18)</b>             | -chr3:58161764-58161876 |  |
| <b>SNP ID</b>                              | rs3772985               |  |
| <b>Predicted Size (Skipping/Inclusion)</b> | 167/280                 |  |



|                                            |                           |  |
|--------------------------------------------|---------------------------|--|
| <b>Gene Symbol</b>                         | <i>EIF4G1</i>             |  |
| <b>Exon Coordinates (hg18)</b>             | +chr3:185531954-185532088 |  |
| <b>SNP ID</b>                              | rs16858676                |  |
| <b>Predicted Size (Skipping/Inclusion)</b> | 121/256                   |  |

|                                            |                         |  |
|--------------------------------------------|-------------------------|--|
| <b>Gene Symbol</b>                         | <i>UTP15</i>            |  |
| <b>Exon Coordinates (hg18)</b>             | +chr5:72904070-72904205 |  |
| <b>SNP ID</b>                              | rs16870610              |  |
| <b>Predicted Size (Skipping/Inclusion)</b> | 181/317                 |  |

|                                            |                          |  |
|--------------------------------------------|--------------------------|--|
| <b>Gene Symbol</b>                         | <i>ATL3</i>              |  |
| <b>Exon Coordinates (hg18)</b>             | -chr11:63157074-63157145 |  |
| <b>SNP ID</b>                              | rs17656941               |  |
| <b>Predicted Size (Skipping/Inclusion)</b> | 172/244                  |  |

|                                            |                         |  |
|--------------------------------------------|-------------------------|--|
| <b>Gene Symbol</b>                         | <i>CAST</i>             |  |
| <b>Exon Coordinates (hg18)</b>             | +chr5:96102205-96102243 |  |
| <b>SNP ID</b>                              | rs7724759               |  |
| <b>Predicted Size (Skipping/Inclusion)</b> | 155/194                 |  |

|                                            |                          |  |
|--------------------------------------------|--------------------------|--|
| <b>Gene Symbol</b>                         | <i>DHX38</i>             |  |
| <b>Exon Coordinates (hg18)</b>             | +chr16:70700815-70700910 |  |
| <b>SNP ID</b>                              | rs17666927               |  |
| <b>Predicted Size (Skipping/Inclusion)</b> | 100/196                  |  |

|                                            |                          |  |
|--------------------------------------------|--------------------------|--|
| <b>Gene Symbol</b>                         | <i>DHRS1</i>             |  |
| <b>Exon Coordinates (hg18)</b>             | -chr14:23830602-23830671 |  |
| <b>SNP ID</b>                              | rs10134537               |  |
| <b>Predicted Size (Skipping/Inclusion)</b> | 109/179                  |  |

|                                            |                          |  |
|--------------------------------------------|--------------------------|--|
| <b>Gene Symbol</b>                         | <i>GALC</i>              |  |
| <b>Exon Coordinates (hg18)</b>             | -chr14:87477492-87477655 |  |
| <b>SNP ID</b>                              | rs448805                 |  |
| <b>Predicted Size (Skipping/Inclusion)</b> | 142/306                  |  |

|                                            |                            |  |
|--------------------------------------------|----------------------------|--|
| <b>Gene Symbol</b>                         | <i>TDG</i>                 |  |
| <b>Exon Coordinates (hg18)</b>             | +chr12:102890868-102890941 |  |
| <b>SNP ID</b>                              | rs17035056                 |  |
| <b>Predicted Size (Skipping/Inclusion)</b> | 229/303                    |  |

|                                            |                           |  |
|--------------------------------------------|---------------------------|--|
| <b>Gene Symbol</b>                         | <i>MOXD1</i>              |  |
| <b>Exon Coordinates (hg18)</b>             | -chr6:132683461-132683520 |  |
| <b>SNP ID</b>                              | rs9493285                 |  |
| <b>Predicted Size (Skipping/Inclusion)</b> | 120/180                   |  |

|                                            |                          |  |
|--------------------------------------------|--------------------------|--|
| <b>Gene Symbol</b>                         | <i>FAM129C</i>           |  |
| <b>Exon Coordinates (hg18)</b>             | +chr19:17509185-17509352 |  |
| <b>SNP ID</b>                              | rs8107859                |  |
| <b>Predicted Size (Skipping/Inclusion)</b> | 102/270                  |  |

|                                            |                        |  |
|--------------------------------------------|------------------------|--|
| <b>Gene Symbol</b>                         | <i>RAP1GAP2</i>        |  |
| <b>Exon Coordinates (hg18)</b>             | +chr17:2815584-2815687 |  |
| <b>SNP ID</b>                              | rs12950923             |  |
| <b>Predicted Size (Skipping/Inclusion)</b> | 128/232                |  |

|                                            |                           |  |
|--------------------------------------------|---------------------------|--|
| <b>Gene Symbol</b>                         | <i>NKAP</i>               |  |
| <b>Exon Coordinates (hg18)</b>             | -chrX:118949927-118950002 |  |
| <b>SNP ID</b>                              | rs194302                  |  |
| <b>Predicted Size (Skipping/Inclusion)</b> | 121/197                   |  |

|                                            |                          |  |
|--------------------------------------------|--------------------------|--|
| <b>Gene Symbol</b>                         | <i>HMSD</i>              |  |
| <b>Exon Coordinates (hg18)</b>             | +chr18:59771568-59771741 |  |
| <b>SNP ID</b>                              | rs9945924                |  |
| <b>Predicted Size (Skipping/Inclusion)</b> | 77/251                   |  |

|                                            |                         |  |
|--------------------------------------------|-------------------------|--|
| <b>Gene Symbol</b>                         | <i>BC039374</i>         |  |
| <b>Exon Coordinates (hg18)</b>             | +chr2:97684049-97684199 |  |
| <b>SNP ID</b>                              | rs11894651              |  |
| <b>Predicted Size (Skipping/Inclusion)</b> | 247/398                 |  |

|                                            |                          |  |
|--------------------------------------------|--------------------------|--|
| <b>Gene Symbol</b>                         | <i>PSAP</i>              |  |
| <b>Exon Coordinates (hg18)</b>             | -chr10:73249228-73249385 |  |
| <b>SNP ID</b>                              | rs11000016               |  |
| <b>Predicted Size (Skipping/Inclusion)</b> | 223/381                  |  |

|                                            |                           |  |
|--------------------------------------------|---------------------------|--|
| <b>Gene Symbol</b>                         | <i>IGF2R</i>              |  |
| <b>Exon Coordinates (hg18)</b>             | +chr6:160399045-160399146 |  |
| <b>SNP ID</b>                              | rs8191828                 |  |
| <b>Predicted Size (Skipping/Inclusion)</b> | 203/305                   |  |

|                                            |                            |  |
|--------------------------------------------|----------------------------|--|
| <b>Gene Symbol</b>                         | <i>POLE</i>                |  |
| <b>Exon Coordinates (hg18)</b>             | -chr12:131724673-131724798 |  |
| <b>SNP ID</b>                              | rs5744973                  |  |
| <b>Predicted Size (Skipping/Inclusion)</b> | 206/332                    |  |

|                                            |                          |  |
|--------------------------------------------|--------------------------|--|
| <b>Gene Symbol</b>                         | <i>AP2S1</i>             |  |
| <b>Exon Coordinates (hg18)</b>             | -chr19:52034562-52034675 |  |
| <b>SNP ID</b>                              | rs312186                 |  |
| <b>Predicted Size (Skipping/Inclusion)</b> | 192/306                  |  |

|                                            |                       |  |
|--------------------------------------------|-----------------------|--|
| <b>Gene Symbol</b>                         | <i>DHRX</i>           |  |
| <b>Exon Coordinates (hg18)</b>             | -chrX:2336786-2336854 |  |
| <b>SNP ID</b>                              | rs5939175;rs73632310  |  |
| <b>Predicted Size (Skipping/Inclusion)</b> | 119/188               |  |

|                                            |                          |  |
|--------------------------------------------|--------------------------|--|
| <b>Gene Symbol</b>                         | <i>NCKAP1L</i>           |  |
| <b>Exon Coordinates (hg18)</b>             | +chr12:53197584-53197693 |  |
| <b>SNP ID</b>                              | rs2270581                |  |
| <b>Predicted Size (Skipping/Inclusion)</b> | 109/219                  |  |

|                                            |                           |  |
|--------------------------------------------|---------------------------|--|
| <b>Gene Symbol</b>                         | <i>HACE1</i>              |  |
| <b>Exon Coordinates (hg18)</b>             | -chr6:105351223-105351324 |  |
| <b>SNP ID</b>                              | rs6918700                 |  |
| <b>Predicted Size (Skipping/Inclusion)</b> | 178/280                   |  |

|                                            |                         |  |
|--------------------------------------------|-------------------------|--|
| <b>Gene Symbol</b>                         | <i>CAPN14</i>           |  |
| <b>Exon Coordinates (hg18)</b>             | -chr2:31264688-31264724 |  |
| <b>SNP ID</b>                              | rs1465972               |  |
| <b>Predicted Size (Skipping/Inclusion)</b> | 217/254                 |  |

|                                            |                         |  |
|--------------------------------------------|-------------------------|--|
| <b>Gene Symbol</b>                         | <i>OSBPL3</i>           |  |
| <b>Exon Coordinates (hg18)</b>             | -chr7:24877886-24877939 |  |
| <b>SNP ID</b>                              | rs6952815               |  |
| <b>Predicted Size (Skipping/Inclusion)</b> | 217/271                 |  |

|                                            |                          |  |
|--------------------------------------------|--------------------------|--|
| <b>Gene Symbol</b>                         | <i>KIAA0556</i>          |  |
| <b>Exon Coordinates (hg18)</b>             | +chr16:27617150-27617322 |  |
| <b>SNP ID</b>                              | rs12920169               |  |
| <b>Predicted Size (Skipping/Inclusion)</b> | 91/264                   |  |

|                                            |                       |  |
|--------------------------------------------|-----------------------|--|
| <b>Gene Symbol</b>                         | <i>EVC</i>            |  |
| <b>Exon Coordinates (hg18)</b>             | +chr4:5797832-5797969 |  |
| <b>SNP ID</b>                              | rs2286343             |  |
| <b>Predicted Size (Skipping/Inclusion)</b> | 214/352               |  |

|                                            |                         |  |
|--------------------------------------------|-------------------------|--|
| <b>Gene Symbol</b>                         | <i>TLN1</i>             |  |
| <b>Exon Coordinates (hg18)</b>             | -chr9:35702002-35702121 |  |
| <b>SNP ID</b>                              | rs2295795               |  |
| <b>Predicted Size (Skipping/Inclusion)</b> | 271/391                 |  |

|                                            |                          |  |
|--------------------------------------------|--------------------------|--|
| <b>Gene Symbol</b>                         | <i>KIAA1731</i>          |  |
| <b>Exon Coordinates (hg18)</b>             | +chr11:93048385-93048480 |  |
| <b>SNP ID</b>                              | rs10831088               |  |
| <b>Predicted Size (Skipping/Inclusion)</b> | 98/194                   |  |

|                                            |                          |  |
|--------------------------------------------|--------------------------|--|
| <b>Gene Symbol</b>                         | <i>PPFIA3</i>            |  |
| <b>Exon Coordinates (hg18)</b>             | +chr19:54328306-54328440 |  |
| <b>SNP ID</b>                              | rs2287761                |  |
| <b>Predicted Size (Skipping/Inclusion)</b> | 67/202                   |  |

|                                            |                         |  |
|--------------------------------------------|-------------------------|--|
| <b>Gene Symbol</b>                         | <i>PBK</i>              |  |
| <b>Exon Coordinates (hg18)</b>             | -chr8:27736499-27736641 |  |
| <b>SNP ID</b>                              | rs727813                |  |
| <b>Predicted Size (Skipping/Inclusion)</b> | 166/309                 |  |

|                                            |                         |  |
|--------------------------------------------|-------------------------|--|
| <b>Gene Symbol</b>                         | <i>AFTPH</i>            |  |
| <b>Exon Coordinates (hg18)</b>             | +chr2:64650261-64650317 |  |
| <b>SNP ID</b>                              | rs2287531               |  |
| <b>Predicted Size (Skipping/Inclusion)</b> | 48/105                  |  |

|                                            |                          |  |
|--------------------------------------------|--------------------------|--|
| <b>Gene Symbol</b>                         | <i>NPCI</i>              |  |
| <b>Exon Coordinates (hg18)</b>             | -chr18:19373773-19373963 |  |
| <b>SNP ID</b>                              | rs1140458                |  |
| <b>Predicted Size (Skipping/Inclusion)</b> | 116/309                  |  |

|                                            |                        |  |
|--------------------------------------------|------------------------|--|
| <b>Gene Symbol</b>                         | <i>CNTROB</i>          |  |
| <b>Exon Coordinates (hg18)</b>             | +chr17:7788519-7788681 |  |
| <b>SNP ID</b>                              | rs11650083             |  |
| <b>Predicted Size (Skipping/Inclusion)</b> | 135/295                |  |

|                                            |                           |  |
|--------------------------------------------|---------------------------|--|
| <b>Gene Symbol</b>                         | <i>AX746648</i>           |  |
| <b>Exon Coordinates (hg18)</b>             | -chr7:155926685-155926835 |  |
| <b>SNP ID</b>                              | rs2272194                 |  |
| <b>Predicted Size (Skipping/Inclusion)</b> | 243/394                   |  |

|                                            |                           |  |
|--------------------------------------------|---------------------------|--|
| <b>Gene Symbol</b>                         | <i>CEPT1</i>              |  |
| <b>Exon Coordinates (hg18)</b>             | +chr1:111527607-111527732 |  |
| <b>SNP ID</b>                              | rs694180                  |  |
| <b>Predicted Size (Skipping/Inclusion)</b> | 237/363                   |  |

|                                            |                           |  |
|--------------------------------------------|---------------------------|--|
| <b>Gene Symbol</b>                         | <i>SNX2</i>               |  |
| <b>Exon Coordinates (hg18)</b>             | +chr5:122158860-122158977 |  |
| <b>SNP ID</b>                              | rs2161391                 |  |
| <b>Predicted Size (Skipping/Inclusion)</b> | 130/248                   |  |

|                                            |                         |  |
|--------------------------------------------|-------------------------|--|
| <b>Gene Symbol</b>                         | <i>TTK</i>              |  |
| <b>Exon Coordinates (hg18)</b>             | +chr6:80778165-80778237 |  |
| <b>SNP ID</b>                              | rs239559                |  |
| <b>Predicted Size (Skipping/Inclusion)</b> | 140/213                 |  |

|                                            |                          |  |
|--------------------------------------------|--------------------------|--|
| <b>Gene Symbol</b>                         | <i>OSBPL2</i>            |  |
| <b>Exon Coordinates (hg18)</b>             | +chr20:60297658-60297781 |  |
| <b>SNP ID</b>                              | rs3746657                |  |
| <b>Predicted Size (Skipping/Inclusion)</b> | 94/218                   |  |

|                                            |                          |  |
|--------------------------------------------|--------------------------|--|
| <b>Gene Symbol</b>                         | <i>ARHGAP23</i>          |  |
| <b>Exon Coordinates (hg18)</b>             | +chr17:33891789-33891910 |  |
| <b>SNP ID</b>                              | rs11867891               |  |
| <b>Predicted Size (Skipping/Inclusion)</b> | 175/297                  |  |

|                                            |                         |  |
|--------------------------------------------|-------------------------|--|
| <b>Gene Symbol</b>                         | <i>C6orf89</i>          |  |
| <b>Exon Coordinates (hg18)</b>             | +chr6:36995332-36995455 |  |
| <b>SNP ID</b>                              | rs11542163              |  |
| <b>Predicted Size (Skipping/Inclusion)</b> | 137/261                 |  |

|                                            |                           |  |
|--------------------------------------------|---------------------------|--|
| <b>Gene Symbol</b>                         | <i>INO80D</i>             |  |
| <b>Exon Coordinates (hg18)</b>             | -chr2:206619473-206619581 |  |
| <b>SNP ID</b>                              | rs2909111                 |  |
| <b>Predicted Size (Skipping/Inclusion)</b> | 143/252                   |  |

|                                            |                           |  |
|--------------------------------------------|---------------------------|--|
| <b>Gene Symbol</b>                         | <i>FIG4</i>               |  |
| <b>Exon Coordinates (hg18)</b>             | +chr6:110212866-110212924 |  |
| <b>SNP ID</b>                              | rs10499054                |  |
| <b>Predicted Size (Skipping/Inclusion)</b> | 187/246                   |  |

|                                            |                         |  |
|--------------------------------------------|-------------------------|--|
| <b>Gene Symbol</b>                         | <i>NCAPG</i>            |  |
| <b>Exon Coordinates (hg18)</b>             | +chr4:17450397-17450558 |  |
| <b>SNP ID</b>                              | rs2286537               |  |
| <b>Predicted Size (Skipping/Inclusion)</b> | 234/396                 |  |

|                                            |                           |  |
|--------------------------------------------|---------------------------|--|
| <b>Gene Symbol</b>                         | <i>ACAD11</i>             |  |
| <b>Exon Coordinates (hg18)</b>             | -chr3:133820168-133820306 |  |
| <b>SNP ID</b>                              | exome sequencing          |  |
| <b>Predicted Size (Skipping/Inclusion)</b> | 73/212                    |  |

|                                            |                           |  |
|--------------------------------------------|---------------------------|--|
| <b>Gene Symbol</b>                         | <i>TNFAIP6</i>            |  |
| <b>Exon Coordinates (hg18)</b>             | +chr2:151930816-151930977 |  |
| <b>SNP ID</b>                              | exome sequencing          |  |
| <b>Predicted Size (Skipping/Inclusion)</b> | 190/352                   |  |

|                                            |                           |  |
|--------------------------------------------|---------------------------|--|
| <b>Gene Symbol</b>                         | <i>PTPN14</i>             |  |
| <b>Exon Coordinates (hg18)</b>             | -chr1:212634865-212634952 |  |
| <b>SNP ID</b>                              | exome sequencing          |  |
| <b>Predicted Size (Skipping/Inclusion)</b> | 121/209                   |  |

|                                            |                           |  |
|--------------------------------------------|---------------------------|--|
| <b>Gene Symbol</b>                         | <i>PDGFRB</i>             |  |
| <b>Exon Coordinates (hg18)</b>             | -chr5:149480960-149481078 |  |
| <b>SNP ID</b>                              | exome sequencing          |  |
| <b>Predicted Size (Skipping/Inclusion)</b> | 172/291                   |  |

|                                            |                           |  |
|--------------------------------------------|---------------------------|--|
| <b>Gene Symbol</b>                         | <i>NID1</i>               |  |
| <b>Exon Coordinates (hg18)</b>             | -chr1:234220809-234220981 |  |
| <b>SNP ID</b>                              | exome sequencing          |  |
| <b>Predicted Size (Skipping/Inclusion)</b> | 194/367                   |  |

|                                            |                      |  |
|--------------------------------------------|----------------------|--|
| <b>Gene Symbol</b>                         | <i>MED16</i>         |  |
| <b>Exon Coordinates (hg18)</b>             | -chr19:826244-826454 |  |
| <b>SNP ID</b>                              | exome sequencing     |  |
| <b>Predicted Size (Skipping/Inclusion)</b> | 124/335              |  |

|                                            |                            |  |
|--------------------------------------------|----------------------------|--|
| <b>Gene Symbol</b>                         | <i>GCNILI</i>              |  |
| <b>Exon Coordinates (hg18)</b>             | -chr12:119077428-119077617 |  |
| <b>SNP ID</b>                              | exome sequencing           |  |
| <b>Predicted Size (Skipping/Inclusion)</b> | 121/311                    |  |

|                                            |                          |  |
|--------------------------------------------|--------------------------|--|
| <b>Gene Symbol</b>                         | <i>ATP6V1E1</i>          |  |
| <b>Exon Coordinates (hg18)</b>             | -chr22:16460960-16461054 |  |
| <b>SNP ID</b>                              | exome sequencing         |  |
| <b>Predicted Size (Skipping/Inclusion)</b> | 101/198                  |  |

|                                            |                          |  |
|--------------------------------------------|--------------------------|--|
| <b>Gene Symbol</b>                         | <i>C2CD3</i>             |  |
| <b>Exon Coordinates (hg18)</b>             | -chr11:73436898-73437031 |  |
| <b>SNP ID</b>                              | exome sequencing         |  |
| <b>Predicted Size (Skipping/Inclusion)</b> | 252/386                  |  |

|                                            |                        |  |
|--------------------------------------------|------------------------|--|
| <b>Gene Symbol</b>                         | <i>SLC4A11</i>         |  |
| <b>Exon Coordinates (hg18)</b>             | -chr20:3159579-3159704 |  |
| <b>SNP ID</b>                              | exome sequencing       |  |
| <b>Predicted Size (Skipping/Inclusion)</b> | 116/242                |  |

|                                            |                         |  |
|--------------------------------------------|-------------------------|--|
| <b>Gene Symbol</b>                         | <i>AARS2</i>            |  |
| <b>Exon Coordinates (hg18)</b>             | -chr6:44380360-44380532 |  |
| <b>SNP ID</b>                              | exome sequencing        |  |
| <b>Predicted Size (Skipping/Inclusion)</b> | 97/270                  |  |

|                                            |                         |  |
|--------------------------------------------|-------------------------|--|
| <b>Gene Symbol</b>                         | <i>WDR46</i>            |  |
| <b>Exon Coordinates (hg18)</b>             | -chr6:33363347-33363473 |  |
| <b>SNP ID</b>                              | rs465151                |  |
| <b>Predicted Size (Skipping/Inclusion)</b> | 226/248                 |  |

|                                            |                        |  |
|--------------------------------------------|------------------------|--|
| <b>Gene Symbol</b>                         | <i>PLD2</i>            |  |
| <b>Exon Coordinates (hg18)</b>             | +chr17:4669690-4669843 |  |
| <b>SNP ID</b>                              | rs3764897              |  |
| <b>Predicted Size (Skipping/Inclusion)</b> | 204/237                |  |

|                                            |                           |  |
|--------------------------------------------|---------------------------|--|
| <b>Gene Symbol</b>                         | <i>C9orf78</i>            |  |
| <b>Exon Coordinates (hg18)</b>             | -chr9:131631336-131631403 |  |
| <b>SNP ID</b>                              | rs3818553                 |  |
| <b>Predicted Size (Skipping/Inclusion)</b> | 216/247                   |  |



|                                            |                           |  |
|--------------------------------------------|---------------------------|--|
| <b>Gene Symbol</b>                         | <i>PKN3</i>               |  |
| <b>Exon Coordinates (hg18)</b>             | +chr9:130522303-130522339 |  |
| <b>SNP ID</b>                              | rs7874430                 |  |
| <b>Predicted Size (Skipping/Inclusion)</b> | 199/243                   |  |

|                                            |                           |  |
|--------------------------------------------|---------------------------|--|
| <b>Gene Symbol</b>                         | <i>PAQR6</i>              |  |
| <b>Exon Coordinates (hg18)</b>             | -chr1:154481176-154481326 |  |
| <b>SNP ID</b>                              | exome sequencing          |  |
| <b>Predicted Size (Skipping/Inclusion)</b> | 277/348                   |  |

|                                            |                           |  |
|--------------------------------------------|---------------------------|--|
| <b>Gene Symbol</b>                         | <i>WDR67</i>              |  |
| <b>Exon Coordinates (hg18)</b>             | +chr8:124223683-124223877 |  |
| <b>SNP ID</b>                              | rs10101626                |  |
| <b>Predicted Size (Skipping/Inclusion)</b> | 146/341                   |  |

|                                            |                         |  |
|--------------------------------------------|-------------------------|--|
| <b>Gene Symbol</b>                         | <i>RCC2</i>             |  |
| <b>Exon Coordinates (hg18)</b>             | -chr1:17621286-17621374 |  |
| <b>SNP ID</b>                              | exome sequencing        |  |
| <b>Predicted Size (Skipping/Inclusion)</b> | 153/242                 |  |

|                                            |                         |  |
|--------------------------------------------|-------------------------|--|
| <b>Gene Symbol</b>                         | <i>FGGY</i>             |  |
| <b>Exon Coordinates (hg18)</b>             | +chr1:59695221-59695336 |  |
| <b>SNP ID</b>                              | exome sequencing        |  |
| <b>Predicted Size (Skipping/Inclusion)</b> | 144/260                 |  |

|                                            |                         |  |
|--------------------------------------------|-------------------------|--|
| <b>Gene Symbol</b>                         | <i>CRYZ</i>             |  |
| <b>Exon Coordinates (hg18)</b>             | -chr1:74957481-74957644 |  |
| <b>SNP ID</b>                              | exome sequencing        |  |
| <b>Predicted Size (Skipping/Inclusion)</b> | 162/326                 |  |

|                                            |                          |  |
|--------------------------------------------|--------------------------|--|
| <b>Gene Symbol</b>                         | <i>CASC5</i>             |  |
| <b>Exon Coordinates (hg18)</b>             | +chr15:38685883-38685942 |  |
| <b>SNP ID</b>                              | exome sequencing         |  |
| <b>Predicted Size (Skipping/Inclusion)</b> | 82/142                   |  |

|                                            |                           |  |
|--------------------------------------------|---------------------------|--|
| <b>Gene Symbol</b>                         | <i>IFIH1</i>              |  |
| <b>Exon Coordinates (hg18)</b>             | -chr2:162844752-162844868 |  |
| <b>SNP ID</b>                              | exome sequencing          |  |
| <b>Predicted Size (Skipping/Inclusion)</b> | 137/254                   |  |

**Table S3:** Primer list.

| <b>Primers for RT-PCR of 84 exons</b> |                                              |                                   |                                          |                                           |
|---------------------------------------|----------------------------------------------|-----------------------------------|------------------------------------------|-------------------------------------------|
| <b>Gene Symbol</b>                    | <b>Forward primer (5' to 3')<sup>a</sup></b> | <b>Reverse primer (5' to 3' )</b> | <b>Predicted skipping form size (bp)</b> | <b>Predicted inclusion form size (bp)</b> |
| <i>PKN2</i>                           | caagcctgatactctcagtca                        | cgagccacaatatctccttcc             | 140                                      | 216                                       |
| <i>TBC1D4</i>                         | tctaccaccaagagccaag                          | tgtgcattttctgggattg               | 125                                      | 236                                       |
| <i>AX747187</i>                       | aaagaaaagcagagtccccc                         | gtcaggaacatccgagcagt              | 276                                      | 369                                       |
| <i>C3orf31</i>                        | gctgagtctggcttctgtct                         | tgcgacagggtcatctactg              | 112                                      | 318                                       |
| <i>IMMT</i>                           | agtttgctctcctcattg                           | ttttggagttgtgaggcag               | 139                                      | 329                                       |
| <i>UNC13D</i>                         | gcagaagacgtacaacgagg                         | gcagtacaccagggccag                | 88                                       | 232                                       |
| <i>TBLIXR1</i>                        | ggcaagatgtccaagcaa                           | ggccttatgctgcctaag                | 83                                       | 147                                       |
| <i>PTPN14</i>                         | ggatggattggacagga                            | gggcagtctcttctttgga               | 111                                      | 200                                       |
| <i>ZNRD1</i>                          | ttgaggggaaggtgtgaag                          | accagacaggtggacaagg               | 212                                      | 322                                       |
| <i>MTF1</i>                           | tgacttgagccttctgtcca                         | caggcacttctggaggtgt               | 295                                      | 398                                       |
| <i>UTP15</i>                          | gatgcacgaacgagtgaag                          | gcaagggcaagactcaaaat              | 181                                      | 317                                       |
| <i>TDG</i>                            | tctctggggtgtcttaccg                          | cttctggcatttgcgttca               | 229                                      | 303                                       |
| <i>NKAP</i>                           | ttctggaaaatcctggaag                          | gccaatcactctctctgtg               | 121                                      | 197                                       |
| <i>HMSD</i>                           | gtctcacttgcctctggg                           | tctccatctcactcctgat               | 77                                       | 251                                       |
| <i>EVC</i>                            | gcctccttgaccttctct                           | gaatcgcaataagcccttc               | 214                                      | 352                                       |
| <i>MPHOSPH9</i>                       | tacagcaaaaattcgacc                           | tagcgtcatcggaactgaac              | 133                                      | 202                                       |
| <i>DNASE1L3</i>                       | atcaggatggagacgcagat                         | caaacaacctggggtcagt               | 167                                      | 280                                       |
| <i>DHRS1</i>                          | ggggattgtgcagacagaac                         | gcaccttaccactcaggctc              | 109                                      | 179                                       |
| <i>CAST</i>                           | ccacctacatagaggaattggg                       | ttcagtttcttccagcagc               | 155                                      | 194                                       |
| <i>DHX38</i>                          | accagctcccttttgggaat                         | ctcctctttggcccagc                 | 100                                      | 196                                       |
| <i>FTSJ3</i>                          | aagcaaaaggcactggacatc                        | atctcagctccacacgctc               | 82                                       | 238                                       |
| <i>TLN1</i>                           | ttgatacggccagtgtgtg                          | aggaaggtgctgaagtctctg             | 271                                      | 391                                       |
| <i>KIAA0556</i>                       | gctgtattccagaccagga                          | ctctctctctctccagca                | 91                                       | 264                                       |
| <i>MMAB</i>                           | tcgacaagtacaccagccag                         | cgagctgatcttgcctcc                | 71                                       | 158                                       |
| <i>KIF18B</i>                         | cagaggatgaggatgaaggc                         | gtcaggaggttggctgctt               | 101                                      | 229                                       |
| <i>EIF4G1</i>                         | ggtcctaaaaaggtggggac                         | tctgctgctcactcaggttg              | 121                                      | 256                                       |
| <i>PFAS</i>                           | catccagagtttctcccctg                         | aatttgaggacgttgggg                | 230                                      | 336                                       |

|                 |                         |                       |     |     |
|-----------------|-------------------------|-----------------------|-----|-----|
| <i>AP2S1</i>    | tccgctttatcctcatccag    | ccaggtccagttcacagaca  | 192 | 306 |
| <i>TRIM62</i>   | caaggtcaagctctctgcc     | ctccagctcctctagcatgg  | 217 | 313 |
| <i>PPFIA3</i>   | aggagtcgttgtatcggcag    | caaaattcccatgacgttcc  | 45  | 180 |
| <i>SLC22A4</i>  | atctccccgatggctgata     | ggagcatccagagacagagc  | 160 | 255 |
| <i>MOXD1</i>    | tcgaaaaggaaggaaatga     | ctcctggtgcttagtctccc  | 120 | 180 |
| <i>FAM129C</i>  | ctctctgccctgaatccttg    | caaagtggccttggtgct    | 102 | 270 |
| <i>PSAP</i>     | aagtcctgtcggaaagagtg    | caagcacacgaaggaaggat  | 223 | 381 |
| <i>NCKAP1L</i>  | ctggagactgtgtggctga     | ttgatgtgtcttcggacca   | 109 | 219 |
| <i>CEPT1</i>    | gacatttggtttgtgtctgct   | ccacccccattctcctaat   | 237 | 363 |
| <i>NCAPG</i>    | ccccgcatcttctcttta      | ttgtagtcaaggtggcatcc  | 234 | 396 |
| <i>DST</i>      | ataagtgcctgaccacccc     | tgtaggtgcagggtgctgct  | 252 | 315 |
| <i>IGF2R</i>    | ccaccccatctttctctca     | ctggctccaattcttgagc   | 203 | 305 |
| <i>SNX2</i>     | cgactttgaggatctggagg    | caggagaaggttccgaggat  | 130 | 248 |
| <i>POLE</i>     | ggtgatgcacttactccgct    | ttcctttgattccgcatag   | 206 | 332 |
| <i>OSBPL3</i>   | ggaagtgggtggaaggactga   | atggtagatgtgctcctcgg  | 217 | 271 |
| <i>NPC1</i>     | catcgcagtcctgaacaaag    | ggcttcaccagtcgaaata   | 118 | 309 |
| <i>CNTROB</i>   | aaatggcagaacgagaggaa    | ggaggcatagtccagaccct  | 132 | 295 |
| <i>C6orf89</i>  | ctgttttcactcacctgcca    | ggacccctctggetataacg  | 137 | 261 |
| <i>TTK</i>      | cggttcacttgggcatttac    | ttcacatcacaatctgggct  | 140 | 213 |
| <i>PBK</i>      | tggctttggtactggggtaa    | gctgctggaaaaggatcttg  | 166 | 309 |
| <i>HACE1</i>    | tggtcagagagatacagcacaga | tgtagcaacttcagcaaggc  | 178 | 280 |
| <i>GALC</i>     | cgagcatcacttcacgctac    | gctgtaactcaacacgtctaa | 142 | 306 |
| <i>BC086863</i> | cgtggaagtatgctacgcaa    | tctcccaaaatgtctctcac  | 109 | 202 |
| <i>ATL3</i>     | atctgcctcaccccaagtc     | agctcctgctgtaaacgaaa  | 172 | 244 |
| <i>RAP1GAP2</i> | ggaggagggaagaggacaacc   | gatccgctcatgtaccgtct  | 128 | 232 |
| <i>BC039374</i> | cgacagggatttaagagagca   | tcgcattgtggtttcaagtc  | 247 | 398 |
| <i>DHRX</i>     | atagtacggggaggacaga     | atggaagtcatggaagccaa  | 119 | 188 |
| <i>CAPN14</i>   | agactgccccctgagttctt    | tctgccttcatfittggtc   | 217 | 254 |
| <i>AX746648</i> | ctctcccaccacatacagca    | tgagcacaggagttcgtgac  | 243 | 394 |
| <i>ARHGAP23</i> | agttcctcaagcagagtgcg    | cctgtaggctggacaccact  | 175 | 297 |
| <i>INO80D</i>   | tgaaaagccacagccttctct   | agctcctactctccgatca   | 143 | 252 |

|                 |                       |                      |     |     |
|-----------------|-----------------------|----------------------|-----|-----|
| <i>FIG4</i>     | atcccactgaagggaaacct  | atggccgaagaactcattg  | 187 | 246 |
| <i>AFTPH</i>    | cttggaatagacacccgaa   | tccttggtggctctaacaat | 48  | 105 |
| <i>OSBPL2</i>   | tgctctggaggatcaacacc  | ccgtgcttctctctgcttct | 94  | 218 |
| <i>KIAA1731</i> | ccacctcctcctccaactct  | tcttgtgctgctgttttg   | 98  | 194 |
| <i>WDR46</i>    | ggcagtttgaccctacaga   | agctcaatgccctgattgtc | 226 | 248 |
| <i>PLD2</i>     | ctacatccacagcaaggtgc  | aagtctggccgggtattg   | 204 | 237 |
| <i>C9orf78</i>  | cctaccaacatggctgtgaa  | tcccactctgcacaactcag | 216 | 247 |
| <i>PKN3</i>     | caggggacacagaggaagag  | cacacagggtaggcacgaag | 199 | 243 |
| <i>WDR67</i>    | cccagagccagaaaactcag  | ttcagcatgttctacagccg | 146 | 341 |
| <i>TNFAIP6</i>  | accacagagaagcacggctct | tactcatttgggaagcctgg | 190 | 352 |
| <i>PTPN14</i>   | ttggcatttctttatgggg   | aaacttgtgctggtggcaa  | 121 | 209 |
| <i>PDGFRB</i>   | ggacatgagcaaggacgagt  | ttgccttcacagatgagcac | 172 | 291 |
| <i>NID1</i>     | ctactgctggtgcgtggat   | aatgatggtggttgctctc  | 194 | 367 |
| <i>MED16</i>    | tgcagcccagtatggtacag  | cagcacaattctcctcgtct | 124 | 335 |
| <i>GCN1L1</i>   | tgagaagaatggcctgaacc  | taactcgtcccaaagcatcc | 121 | 311 |
| <i>ATP6V1E1</i> | tgattgttcgttcaggaaa   | tccaggggtgttgaaacct  | 101 | 196 |
| <i>C2CD3</i>    | ggggcagataaaagtgtctg  | tcagaatggaggttgggag  | 252 | 386 |
| <i>SLC4A11</i>  | ccctgtacccttggactt    | gtggtcagcagaatcaccaa | 116 | 242 |
| <i>AARS2</i>    | acgacagcccaagtacaac   | ggatgaacctccacagacc  | 97  | 270 |
| <i>PAQR6</i>    | ccattctgttcgacaacct   | ctctgcgtgatccatataca | 277 | 348 |
| <i>RCC2</i>     | tcacgagggcttagccac    | gaggttctcttgcagtcca  | 153 | 242 |
| <i>CRYZ</i>     | ccccgtggagacatacatc   | ccccatgaaccagaacactc | 162 | 326 |
| <i>IFIH1</i>    | aagcaagccaagctgaaga   | gcccattgttcatagggttg | 137 | 254 |
| <i>CASC5</i>    | gagacctgttagaagacggca | atctgcaaagctgactcgac | 82  | 142 |
| <i>ACAD11</i>   | aattcagtggaacaagtgggg | tgcagaacctccatattccc | 73  | 212 |
| <i>FGGY</i>     | taaggcgggacatttctttg  | ggagaaggccaaggtctctt | 144 | 260 |
|                 |                       |                      |     |     |

| <b>Primers for minigene construction and RT-PCR</b> |                                                 |                                           |                                                |
|-----------------------------------------------------|-------------------------------------------------|-------------------------------------------|------------------------------------------------|
| <b>Gene Symbol</b>                                  | <b>Forward primer (5' to 3' )</b>               | <b>Reverse primer (5' to 3' )</b>         | <b>Size of amplified genomic fragment (bp)</b> |
| <i>BC039374</i>                                     | gggcatgacttctaggggcccttcaccgtcttagccaggat       | gtcgacggcctctagagatctatcagaatcaccaggctgt  | 579                                            |
| <i>TDG</i>                                          | gggcatgacttctaggggccctttttattcagccaactgtg       | gtcgacggcctctagagatctccagctagttcaggatgc   | 438                                            |
| <i>CAST</i>                                         | gggcatgacttctaggggcccttgattctataaggaaacctatctca | gtcgacggcctctagagatcttcaggagcactgagacaacc | 394                                            |
| <i>DHRS1</i>                                        | gggcatgacttctaggggcccgactaccagatcctcca          | gtcgacggcctctagagatctagcctgctcctaaggctctc | 495                                            |
| <i>BC086863</i>                                     | gggcatgacttctaggggccctcgaattctcaaagggtagca      | gtcgacggcctctagagatcttggtgaagcatgggatcaat | 497                                            |
| <i>TRIM62</i>                                       | gggcatgacttctagccatgtgcagttcacactcc             | gtcgacggcctctagcaggcaatctcccatctgt        | 1220                                           |
| <i>HMSD</i>                                         | gggcatgacttctagcaccatccctgtgttccttc             | gtcgacggcctctagtgccttttgcaaacctaac        | 1360                                           |
| <i>Minigene_RT-PCR</i>                              | cgctcgccgtccagctcgaccaggaattcgagctcactctcttc    | aagcttaggctcttgccgtt                      | 122 (skipping form)                            |
| <b>Primers for realtime qPCR assay</b>              |                                                 |                                           |                                                |
| <b>Gene Symbol</b>                                  | <b>Forward primer (5' to 3' )</b>               | <b>Reverse primer (5' to 3' )</b>         | <b>Fragment Size (bp)</b>                      |
| <i>HNRNPH1</i>                                      | cttgccctggctctgctc                              | cttggtctgcctctctggt                       | 111                                            |
| <i>ACTB</i>                                         | gagctacgagctgcctgacg                            | gtagttctgctgatgccacag                     | 120                                            |

a. A 22 nt universal tag sequence (5'-cgctcgccgtccagctcgaccag-3'), derived from the GFP N-terminal region, was added to the 5' end of the forward gene-specific primer. A fluorescently labeled universal primer 5'FAM-cgctcgccgtccagctcgaccag-3' was added as the third primer in RT-PCR reaction. Predicted fragment size does not include the tag sequence in the primers.

**Table S4: Splice site sequences used in minigene splicing reporters.**

| Splice site sequence        | Splice site score <sup>a</sup> | Note                                                                                                     |
|-----------------------------|--------------------------------|----------------------------------------------------------------------------------------------------------|
| aaa  gtgagg                 | 4.44                           | 5' splice site sequences used in <i>TRIM62</i> and <i>HMSD</i> minigene experiments (Fig. 3C).           |
| aag  gttagc                 | 5.61                           |                                                                                                          |
| aag  gtcagc                 | 7.09                           |                                                                                                          |
| cag  gtacat                 | 7.79                           |                                                                                                          |
| aaa  gtgagt                 | 8.40                           |                                                                                                          |
| aag  gtgagc                 | 9.60                           |                                                                                                          |
| cag  gtacgt                 | 10.65                          |                                                                                                          |
| aag  gtaagt                 | 11.00                          |                                                                                                          |
| caaattaatatttgtttaag  aaa   | 1.59                           | 3' splice site sequences used in <i>CAST</i> minigene experiments (Fig. 4C).                             |
| caaattaatatttgatttag  aaa   | 3.39                           |                                                                                                          |
| caaattaatatttgtttcag  aaa   | 5.40                           |                                                                                                          |
| caaattaatatttgtttcag  gta   | 6.97                           |                                                                                                          |
| caaattaatatttttttttcag  gta | 8.84                           |                                                                                                          |
| cattttttttttttgtttcag  aaa  | 10.90                          |                                                                                                          |
| cattttttttttttgtttcag  gta  | 12.47                          |                                                                                                          |
| cggccctgtgtgtgtgtaag  agg   | 2.07                           | 3' splice site sequences used in <i>TRIM62</i> minigene experiments (Fig. 4D, Fig. 5, Fig. S3, Fig. S4). |
| cggccctgtgtgtgggtcag  agg   | 4.03                           |                                                                                                          |
| cggccctgtgtgtgtttaag  agg   | 5.93                           |                                                                                                          |
| cggccctgtgtatatttcag  agg   | 8.00                           |                                                                                                          |
| cggccctgtgtgtgttttcag  agg  | 9.70                           |                                                                                                          |

<sup>a</sup>: Splice site score is calculated by MAXENT (see Materials and Methods).
